# Supplementary material for: Modulation of Campylobacter jejuni Motility, Adhesion to Polystyrene Surfaces, and Invasion of INT407 Cells by Quorum-Sensing Inhibition
Source: PubMed Central journal article supplement (PMC7022965; doi:10.3390/microorganisms8010104), 2020-01-11
Supplement: microorganisms-08-00104-s001.pdf [file microorganisms-08-00104-s001.pdf]

## Supplementary Information

**Supplementary Table S1.** Details of the treatments used in this study, with their corresponding antimicrobial activities.

| Preparation           | Code                    | Plant/ substance              | Source                           | MIC (mg/L) |       |
|-----------------------|-------------------------|-------------------------------|----------------------------------|------------|-------|
|                       |                         |                               |                                  | 1.0×       | 0.25× |
| Essential oils        | EO1                     | <i>Juniperus communis</i>     | Herbana d.o.o.,<br>Slovenia      | 250        | 62.5  |
|                       | EO2                     | <i>Origanum</i> sp.           | Lek Veterina d.o.o.,<br>Slovenia | 62.5       | 15.62 |
|                       | EO3                     | <i>Syzygium aromaticum</i>    | Lek Veterina d.o.o.,<br>Slovenia | 250        | 62.5  |
|                       | EO4                     | <i>Rosmarinus officinalis</i> | Lek Veterina d.o.o.,<br>Slovenia | 125        | 31.25 |
|                       | EO5                     | <i>Lavandula hybrida</i>      | M. Jeršek s.p.,<br>Slovenia      | 250        | 62.5  |
|                       | EO6                     | <i>Thymus vulgaris</i>        | Lek Veterina d.o.o.,<br>Slovenia | 62.5       | 15.62 |
| Ethanolic<br>extracts | E1 (pre-distillation)   | <i>Origanum</i> sp.           | This study                       | 250        | 62.5  |
|                       | E2 (post-distillation)  | <i>Origanum</i> sp.           | This study                       | 250        | 62.5  |
|                       | E3 (leaves)             | <i>Origanum</i> sp.           | This study                       | 500        | 125   |
|                       | E4 (flowers)            | <i>Origanum</i> sp.           | This study                       | 500        | 125   |
|                       | E5 (pre-distillation)   | <i>Urtica dioica</i>          | This study                       | 1000       | 250   |
|                       | E6 (post-distillation)  | <i>Urtica dioica</i>          | This study                       | 1000       | 250   |
|                       | E7                      | <i>Satureja montana</i>       | This study                       | 250        | 62.5  |
|                       | E8                      | <i>Sedum rosea</i>            | Alperth et al. 2019              | 500        | 125   |
|                       | E9 (pre-distillation)   | <i>Achillea millefolium</i>   | This study                       | 1000       | 250   |
|                       | E10 (post-distillation) | <i>Achillea millefolium</i>   | This study                       | 1000       | 250   |
|                       | E11                     | <i>Rosmarinus officinalis</i> | This study                       | 500        | 125   |
| Pure<br>compounds     | P1                      | Carvacrol                     | Sigma                            | 31.25      | 7.81  |
|                       | P2                      | Rosmarinic acid               | Sigma                            | 250        | 62.5  |
|                       | P3                      | $\gamma$ -Terpinene           | Sigma                            | 125        | 31.25 |

**Supplementary Table S2.** *C. jejuni* 11168 motility (colony diameter in mm), adhesion on polystyrene surfaces (log<sub>10</sub> CFU/well) and invasion of and adhesion to INT407 cells (log<sub>10</sub> CFU/mL) in un-treated culture (Control) and in treated cultures. Results are presented as mean ± standard deviation (SD).

| Treatment code | Motility       |    | Adhesion on polystyrene surfaces |      | Invasion of INT407       |      | Adhesion of INT407       |      |
|----------------|----------------|----|----------------------------------|------|--------------------------|------|--------------------------|------|
|                | Diameter in mm | SD | log <sub>10</sub> CFU/well       | SD   | log <sub>10</sub> CFU/mL | SD   | log <sub>10</sub> CFU/mL | SD   |
| Control        | 78             | 1  | 7.19                             | 0.05 | 4.75                     | 0.06 | 5.79                     | 0.20 |
| EO1            | 74             | 2  | 5.30                             | 0.05 | 4.12                     | 0.23 | 5.54                     | 0.23 |
| EO2            | 66             | 9  | 7.23                             | 0.10 | 4.13                     | 0.25 | 5.36                     | 0.20 |
| EO3            | 66             | 3  | 6.51                             | 0.13 | 4.14                     | 0.11 | 5.73                     | 0.26 |
| EO4            | 64             | 8  | 6.14                             | 0.26 | 4.10                     | 0.17 | 5.51                     | 0.12 |
| EO5            | 67             | 5  | 5.75                             | 0.07 | 3.83                     | 0.25 | 5.54                     | 0.10 |
| EO6            | 73             | 6  | 6.83                             | 0.39 | 3.82                     | 0.32 | 5.54                     | 0.11 |
| E1             | 73             | 3  | 7.12                             | 0.04 | 3.96                     | 0.46 | 5.50                     | 0.26 |
| E2             | 69             | 5  | 7.05                             | 0.04 | 3.90                     | 0.38 | 5.52                     | 0.25 |
| E3             | 69             | 8  | 6.85                             | 0.18 | 3.93                     | 0.33 | 5.42                     | 0.38 |
| E4             | 70             | 1  | 6.99                             | 0.07 | 3.96                     | 0.47 | 5.11                     | 0.17 |
| E5             | 71             | 6  | 7.13                             | 0.25 | 4.18                     | 0.45 | 5.40                     | 0.06 |
| E6             | 72             | 2  | 7.19                             | 0.11 | 3.88                     | 0.46 | 5.35                     | 0.28 |
| E7             | 72             | 5  | 7.11                             | 0.13 | 4.04                     | 0.14 | 5.21                     | 0.14 |
| E8             | 51             | 11 | 5.77                             | 0.22 | 4.01                     | 0.35 | 5.55                     | 0.25 |
| E9             | 76             | 2  | 6.82                             | 0.38 | 3.76                     | 0.37 | 5.38                     | 0.07 |
| E10            | 74             | 7  | 6.76                             | 0.32 | 4.01                     | 0.31 | 5.49                     | 0.11 |
| E11            | 64             | 13 | 7.26                             | 0.10 | 3.76                     | 0.26 | 5.40                     | 0.13 |
| P1             | 74             | 8  | 6.94                             | 0.25 | 3.73                     | 0.34 | 5.35                     | 0.30 |
| P2             | 71             | 3  | 7.18                             | 0.02 | 4.18                     | 0.23 | 5.34                     | 0.24 |
| P3             | 68             | 3  | 6.16                             | 0.06 | 4.07                     | 0.21 | 5.16                     | 0.23 |

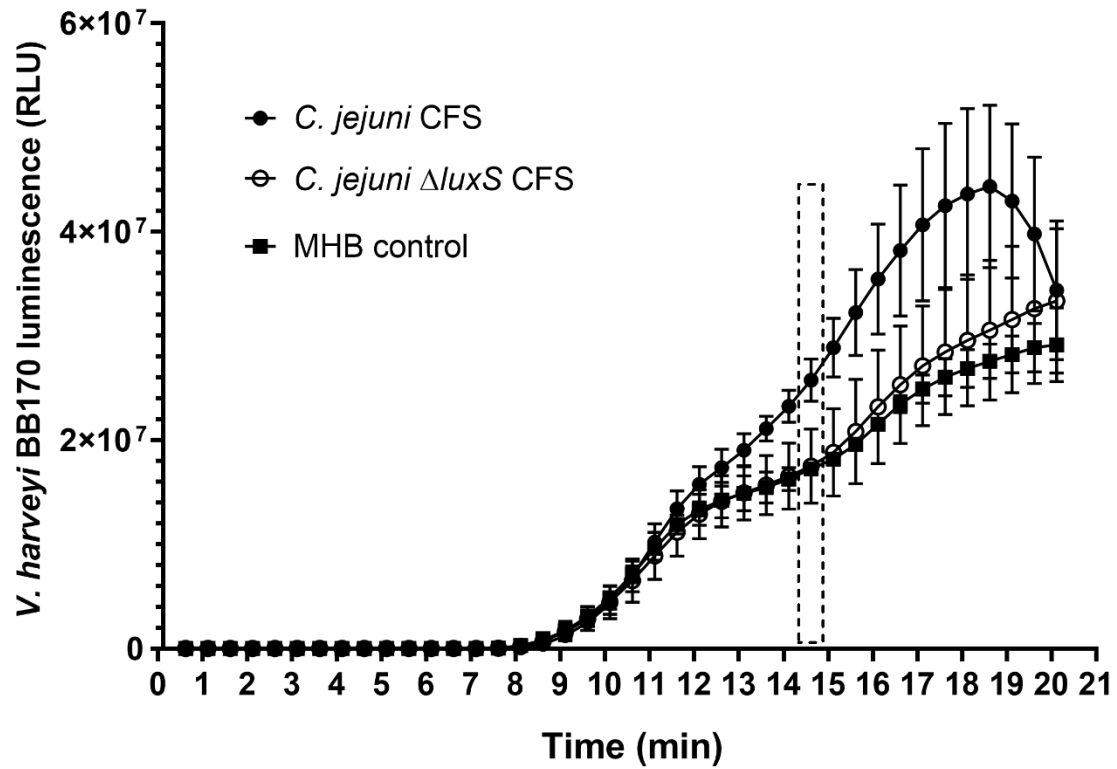

**Supplementary Figure S1.** *V. harveyi* BB170 luminescence production after addition of *C. jejuni* 11168 and *C. jejuni* 11168 $\Delta luxS$  cell-free supernatants, and the Mueller Hinton broth control (MHB). Data are means  $\pm$  standard deviation of kinetic measurements every 30 min. Dashed box, time point used for further quorum-sensing inhibition measurements (14.5 h); RLU, relative luminescence units.

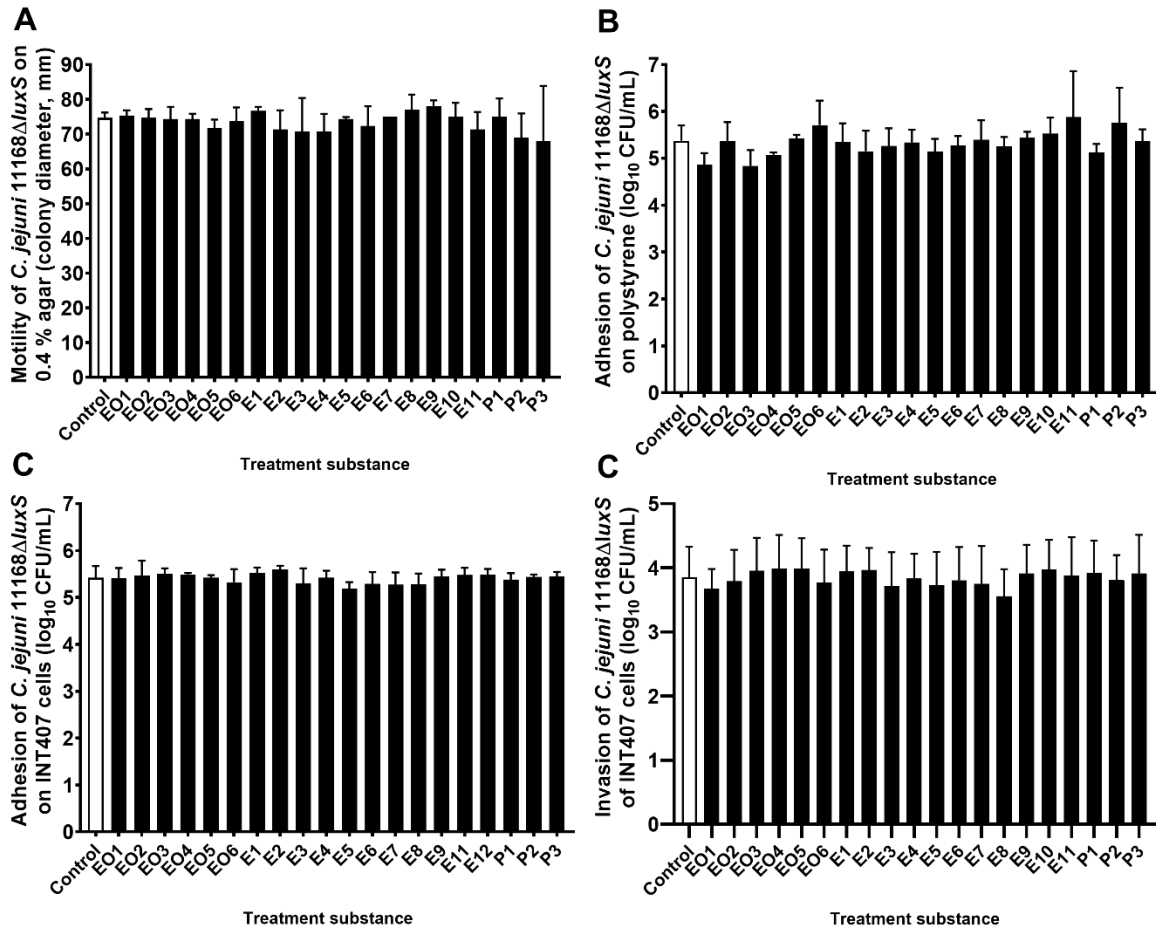

**Supplementary Figure S2.** *C. jejuni* 11168 $\Delta\Delta$ luxS (A) motility on 0.4 % agar (colony diameter, mm), (B) adhesion on polystyrene (log<sub>10</sub> CFU/well), (C) adhesion and (D) invasion of INT407 cells (CFU/mL), without (Control, empty bar) and with treatments with essential oils (EO1-6), ethanolic extracts (E1-11), and pure compounds (P1-3) (full bars). Data are means  $\pm$  standard deviations.
